# Supplementary material
Source: publisher figshare collection journal article supplement (https://frontiersin.figshare.com/ndownloader/files/28007451)
Supplement: Supplementary file [file 28007451]

## Supplementary Information

### **A novel heptapeptide, GPPGPAG transfers to the brain, and ameliorates memory dysfunction and dendritic atrophy in Alzheimer's disease model mice**

Chihiro Tohda<sup>1\*</sup>, Chisato Kogure<sup>1</sup>, Kaori Nomoto<sup>1,2</sup>, Andreia de Toledo<sup>2</sup>, Ximeng Yang<sup>1</sup> & Eiichi Hirano<sup>2</sup>

1 Section of Neuromedical Science, Division of Bioscience, Institute of Natural Medicine, University of Toyama, Toyama, Japan

2 Research Institute Japan Bio Products Co., Ltd. Kurume, Japan.

Chihiro Tohda, Chisato Kogure and Kaori Nomoto contributed equally.

\*Correspondence: Chihiro Tohda, Ph.D.

Section of Neuromedical Science, Division of Bioscience, Institute of Natural Medicine, University of Toyama, 2630 Sugitani, Toyama 930-0194, Japan

E-mail: [chihiro@inm.u-toyama.ac.jp](mailto:chihiro@inm.u-toyama.ac.jp)

Phone: +81-76-434-7646

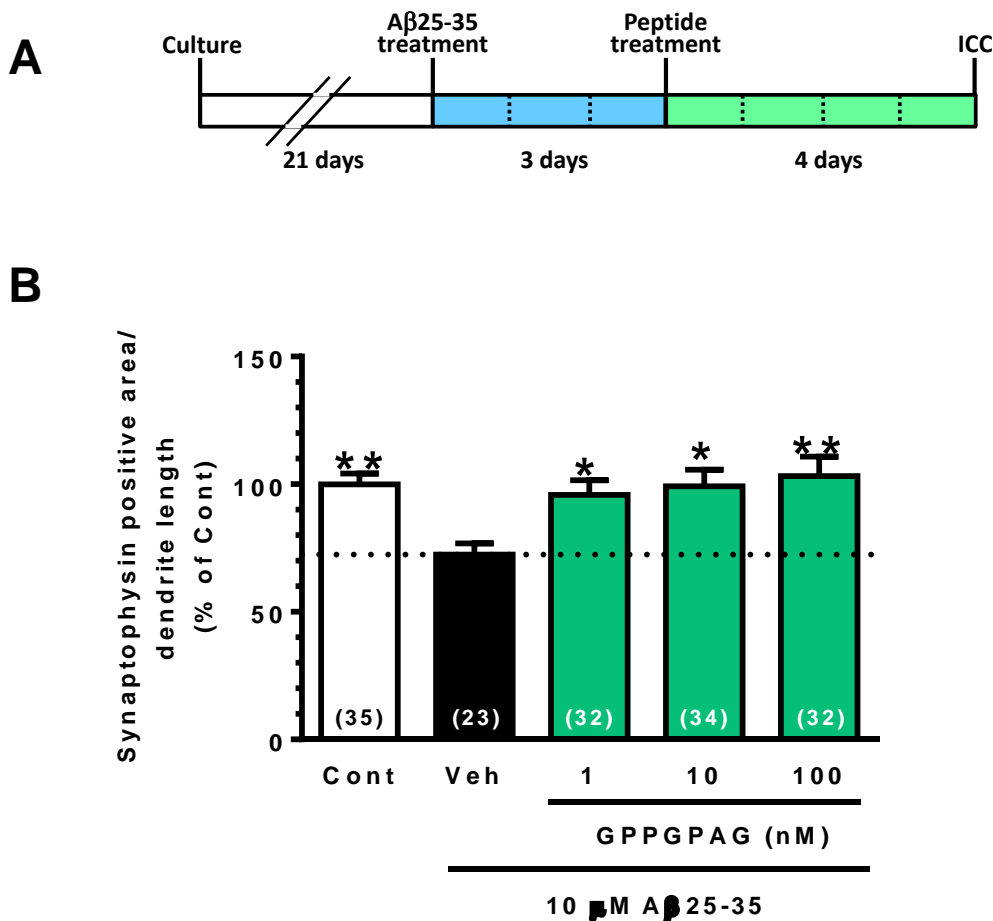

### Supplementary Figure 1

Effect of GPPGPAG on A $\beta$ -induced pre-synaptic loss.

(A) Cortical neurons were cultured for 21 days and then treated with or without aggregated A $\beta$ (25-35) (10  $\mu$ M). Three days after the administration of A $\beta$ 25-35, the cells were treated with GPPGPAG or a vehicle solution (distilled) water. After an additional 4-days of treatment, the cells were fixed and double-immunostained for MAP2 and synaptophysin. (B) The synaptophysin-positive puncta area was quantified for each dendrite. \*P < 0.05, \*\*P < 0.01 vs A $\beta$ 25-35/Veh, one-way ANOVA with *post hoc* Bonferroni's test, n = 23 - 35.

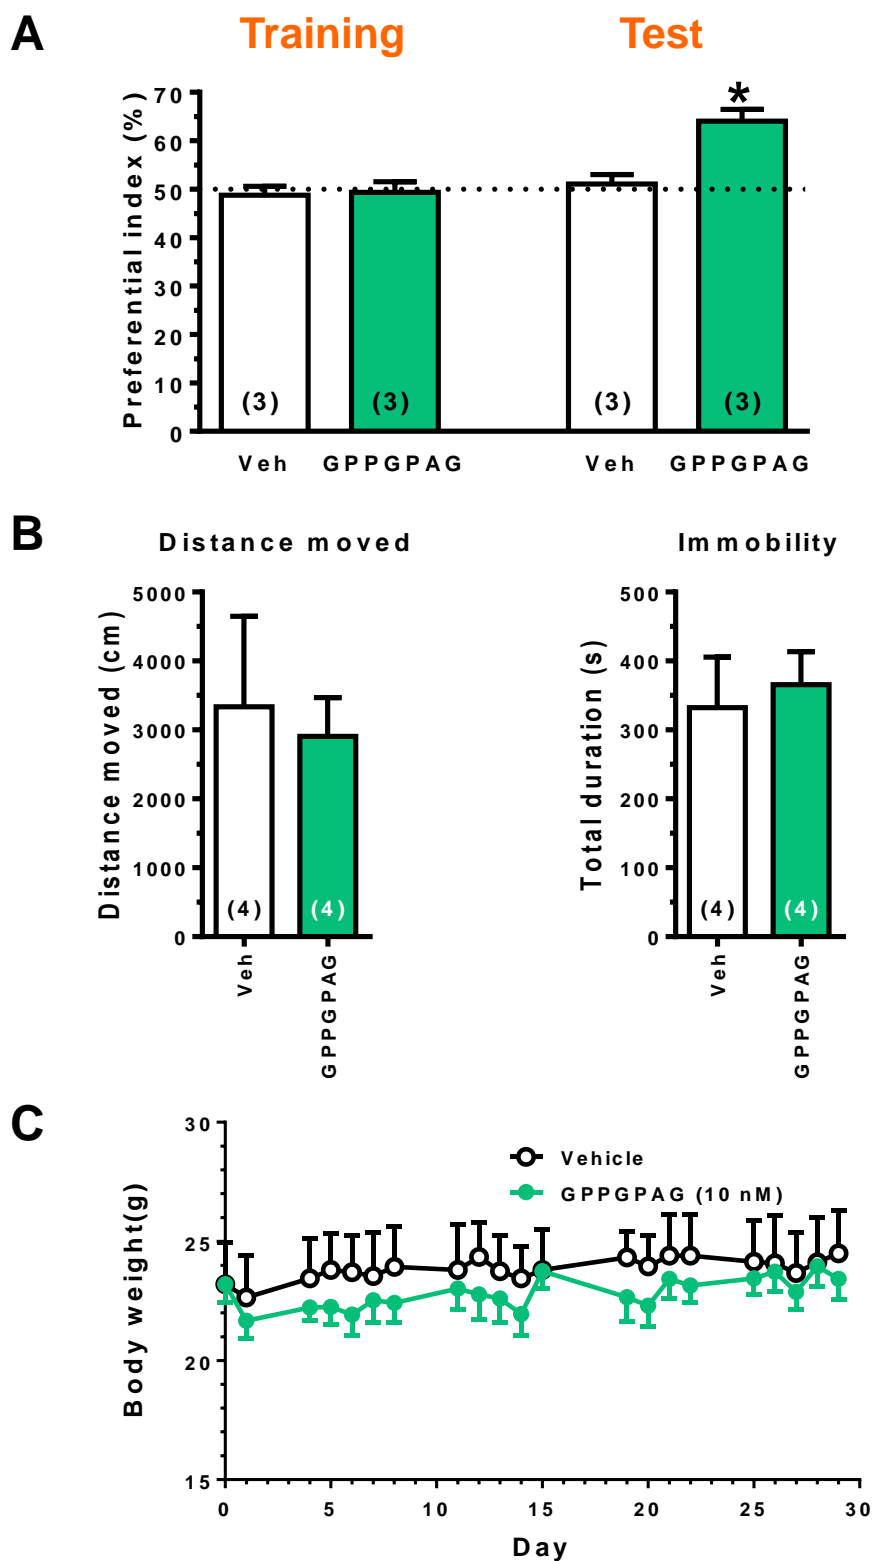

Supplementary Figure 2

Effect of i.c.v. infusion of GPPGPAG on object recognition memory deficits in 5XFAD mice (A) GPPGPAG or vehicle solution (artificial cerebrospinal fluid; ACSF) was continuously administered to the lateral ventricle for 28 days in mice (females, 5 - 7 months old). The dose of GPPGPAG was set as 10 nM in ACSF. An object recognition test was carried out with a 24 h interval time. The preferential indices of the training and test sessions are shown. \* $P < 0.05$  vs. the same group in the training session, paired t-test;  $n = 3$  mice). (B) Locomotion was evaluated by open field test. Distance moved and duration with immobility were shown. (C) Body weight of mice during whole experimental period are shown. Repeated measures two-way ANOVA revealed no significant difference among four groups.

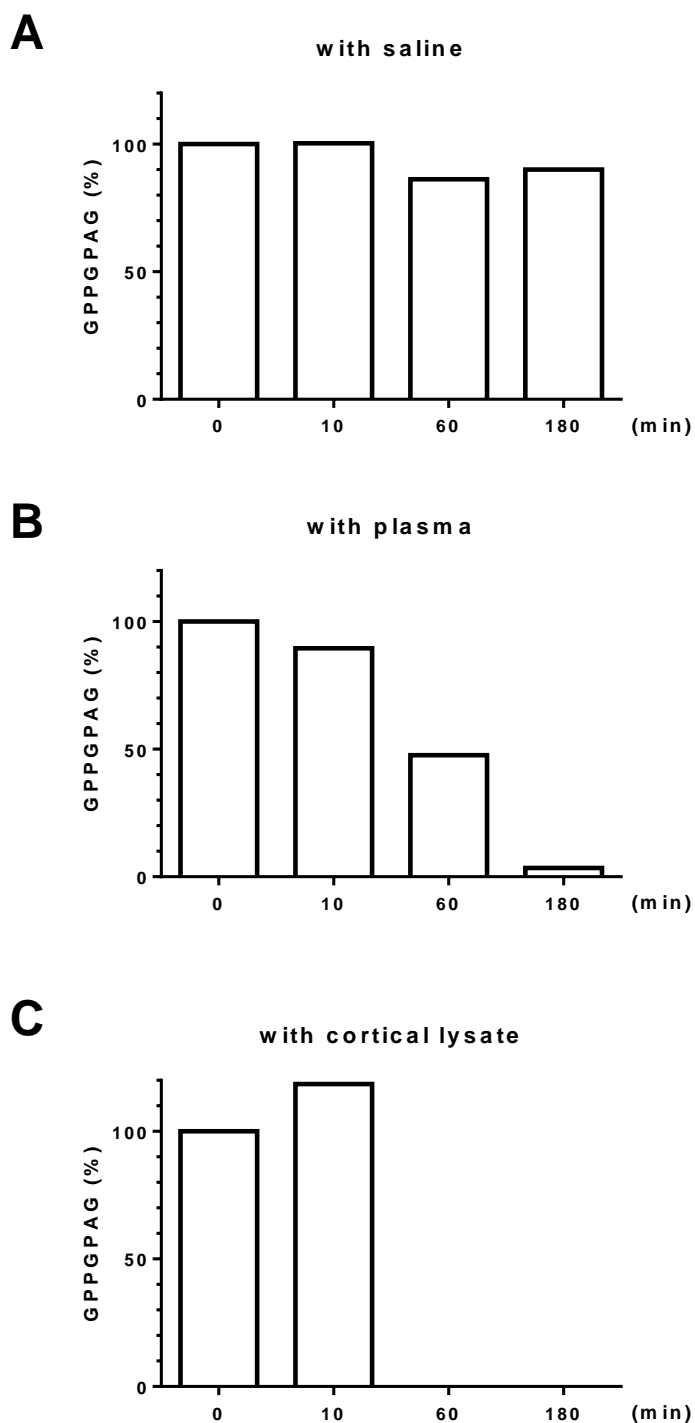

Supplementary Figure 3

Stability of GPPGPAG in biological fluids.

(A) GPPGPAG was mixed with saline at 5  $\mu\text{g/ml}$  concentration. (B) GPPGPAG was mixed with mouse plasma at 5  $\mu\text{g/ml}$  concentration. (C) GPPGPAG was mixed with fresh lysate of mouse cerebral cortex at 6.5  $\mu\text{g/g}$  of cortex. After incubation at 37° C for 0, 10, 60 and 180 min, samples were dried up and served to LC-MS. Areas of MS peaks of GPPGPAG were quantified.  $n = 1$ .

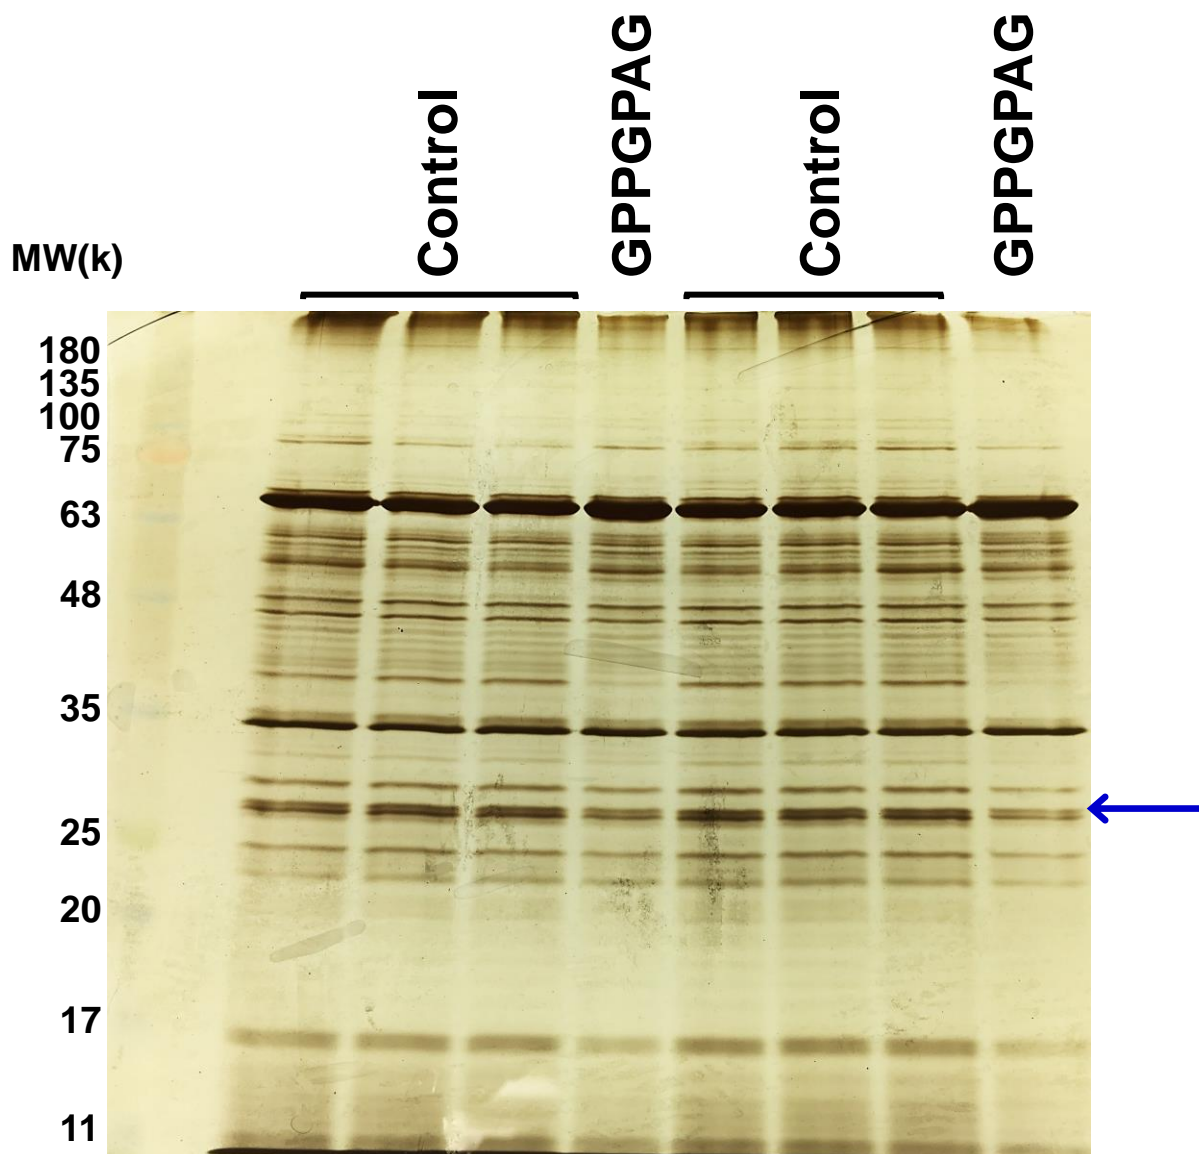

Supplementary Figure 4

DARTS analysis of mouse cortical neurons was performed using cultured cortical neurons. After treatment with vehicle solution (water) or 10 nM GPPGPAG for 30 min at 37°C, cell lysate was prepared, and thermolysin reaction was performed. At 28 k, the band level in GPPGPAG-treated neuronal lysate was thinner compared with the vehicle solution-treated group.

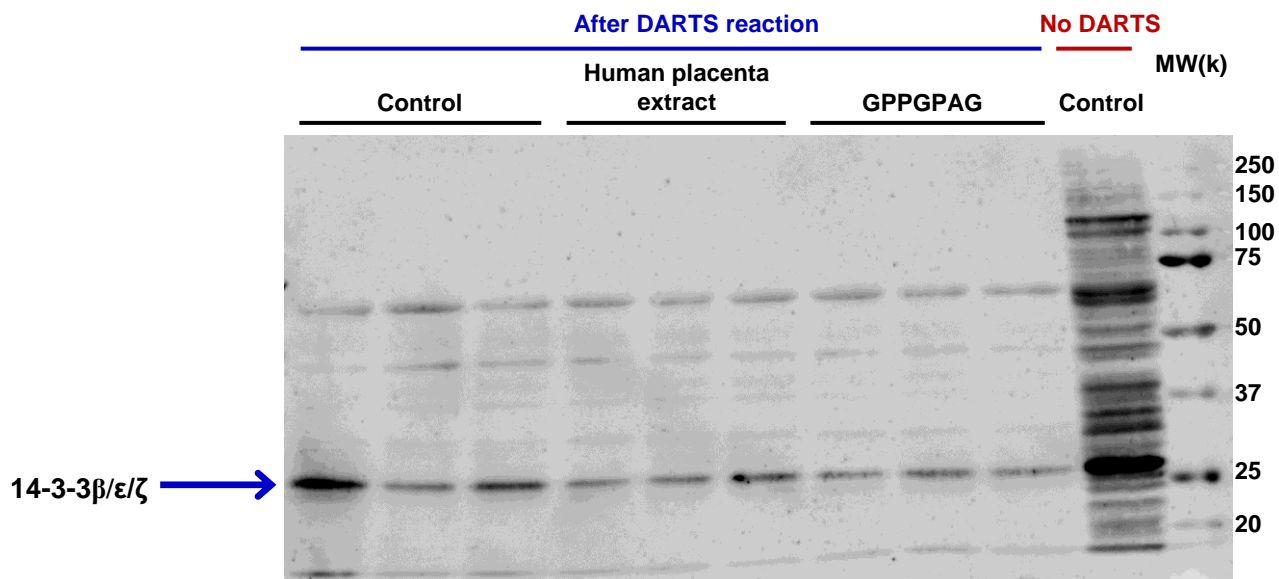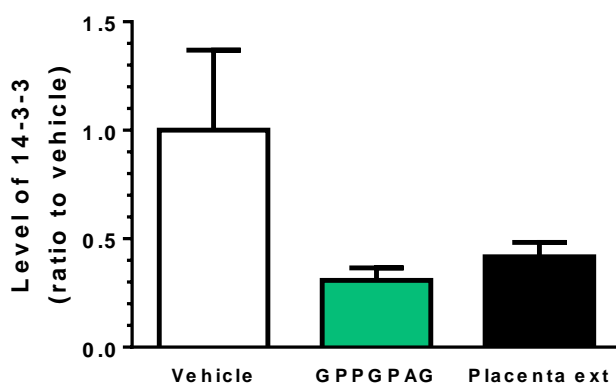

### Supplementary Figure 5

DARTS analysis and then western blotting for 14-3-3 protein were performed using mouse cortical neurons. After treatment neuronal lysate with vehicle solution (water), 10 nM GPPGPAG or positive control 10 µg/ml human placenta extract for 30 min at room temperature, thermolysin reaction was performed. After SDS-PAGE, gel was transferred to a nitrocellulose membrane, western blotting for 14-3-3β/ε/ζ was performed. Without DARTS reaction, undigested protein bands were loaded on the lane (No DARTS). The band level in GPPGPAG-treated neuronal lysate was thinner compared with the vehicle solution-treated group.

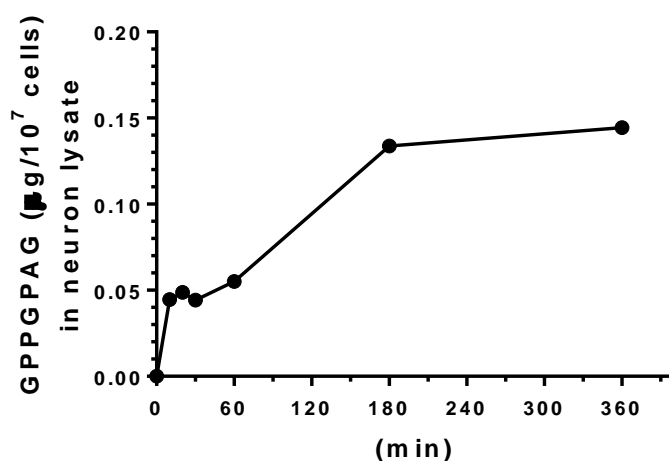

#### Supplementary Figure 6

Intracellular amount of GPPGPAG after addition to cultured cortical neurons.

Mouse cortical neurons were seeded at  $1.0 \times 10^7$  cells/10-cm dish. After 3 – 4 days culture, 1 mg/dish GPPGPAG was added. Incubation time was 0, 10, 20, 30, 60, 180 and 360 min. After complete washing by PBS, cell lysate was prepared by M-PER solution. The lysate was ultrasonicated with methanol for 60 sec, and centrifuged (12000g) for 10 min at 4°C. Supernatant was dried up and served for LC-MS analysis.
